# Supplementary material
Source: PubMed Central journal article supplement (PMC8789238)
Supplement: mmc1.pdf [file mmc1.pdf]

# THE LANCET

## Supplementary appendix

This appendix formed part of the original submission. We post it as supplied by the authors.

Supplement to: Fendler A, Shepherd S T C, Au L, et al. Omicron neutralising antibody in patients with cancer after third COVID-19 vaccine dose. *Lancet* 2022; published online Jan, 25. [https://doi.org/10.1016/S0140-6736\(22\)00147-7](https://doi.org/10.1016/S0140-6736(22)00147-7).

1 **Table S1: Baseline characteristics of CAPTURE cohort before the third COVID-19**  
2 **vaccine dose**  
3

|                                                      | Patients with an evaluable sample prior to 3 <sup>rd</sup> vaccine, n=179 |                                                      |                               |                                  |         |
|------------------------------------------------------|---------------------------------------------------------------------------|------------------------------------------------------|-------------------------------|----------------------------------|---------|
|                                                      | Full Cohort                                                               | No evaluable sample prior to 3 <sup>rd</sup> vaccine | Detectable NAb to Omicron VOC | No detectable NAb to Omicron VOC | p-value |
|                                                      | n=199                                                                     | n=20                                                 | n=52                          | n=127                            |         |
| Age, years (median, IQR)                             | 63 (55-70)                                                                | 57(48-68)                                            | 60 (54-66)                    | 64 (55-71)                       | 0.16    |
| Male, n(%)                                           | 113 (57)                                                                  | 9 (45)                                               | 31 (60)                       | 73 (57)                          | 0.92    |
| Ethnicity, white, n(%)                               | 179 (90)                                                                  | 19 (95)                                              | 46 (88)                       | 114 (90)                         | 0.88    |
| <b>1st and 2nd COVID-19 vaccine, n (%)</b>           |                                                                           |                                                      |                               |                                  |         |
| ChAdOx1                                              | 133 (67)                                                                  | 14 (70)                                              | 32 (62)                       | 87 (69)                          | 0.37    |
| BNT162b2                                             | 66 (33)                                                                   | 6 (30)                                               | 20 (38)                       | 40 (31)                          |         |
| <b>Third COVID-19 vaccine, n(%)</b>                  |                                                                           |                                                      |                               |                                  |         |
| ChAdOx1                                              | 0 (0)                                                                     | 0 (0)                                                | 0 (0)                         | 0 (0)                            |         |
| BNT162b2                                             | 199 (100)                                                                 | 20 (100)                                             | 52 (100)                      | 127 (100)                        | NA      |
| Previous SARS-CoV-2 Infection, n(%)                  | 22 (11)                                                                   | 0 (0)                                                | 16 (31)                       | 6 (5)                            | <0.0001 |
| <b>Cancer type, n(%)</b>                             |                                                                           |                                                      |                               |                                  |         |
| Solid cancer                                         | 115 (58)                                                                  | 15 (75)                                              | 37 (71)                       | 63 (50)                          | 0.0083  |
| Blood cancer                                         | 84 (42)                                                                   | 5 (25)                                               | 15 (29)                       | 64 (50)                          |         |
| <b>Solid cancers</b>                                 | <b>n=115</b>                                                              | <b>n=15</b>                                          | <b>n=37</b>                   | <b>n=63</b>                      |         |
| <b>Cancer stage, n(%)</b>                            |                                                                           |                                                      |                               |                                  |         |
| Stage I-II                                           | 17 (15)                                                                   | 3 (20)                                               | 3 (8)                         | 11 (17)                          | 0.42    |
| Stage III                                            | 26 (22)                                                                   | 4 (27)                                               | 9 (24)                        | 13 (21)                          |         |
| Stage IV                                             | 72 (63)                                                                   | 8 (53)                                               | 25 (46)                       | 39 (62)                          |         |
| <b>Rx prior to 1st vaccine dose, n(%)</b>            |                                                                           |                                                      |                               |                                  |         |
| Chemotherapy, <28 days                               | 26 (23)                                                                   | 2 (13)                                               | 10 (27)                       | 14 (22)                          | 0.76    |
| Targeted therapy, <28 days                           | 39 (34)                                                                   | 4 (27)                                               | 10 (27)                       | 25 (40)                          | 0.29    |
| Anti-PD(L)1 ± anti-CTLA4, <183 days                  | 28 (24)                                                                   | 2 (13)                                               | 9 (24)                        | 17 (27)                          | 0.95    |
| No recent SACT                                       | 36 (31)                                                                   | 6 (40)                                               | 12 (32)                       | 18 (29)                          | 0.73    |
| <b>Rx prior to 3<sup>rd</sup> vaccine dose, n(%)</b> |                                                                           |                                                      |                               |                                  |         |
| Chemotherapy, <28 days                               | 21(18)                                                                    | 2 (13)                                               | 6 (16)                        | 13 (21)                          | 0.78    |
| Targeted therapy, <28 days                           | 41 (36)                                                                   | 3 (20)                                               | 13 (35)                       | 25 (40)                          | 0.81    |
| Anti-PD(L)1 ± anti-CTLA4, <183 days                  | 26 (23)                                                                   | 3 (20)                                               | 7 (19)                        | 16 (25)                          | 0.62    |
| No recent SACT                                       | 36 (31)                                                                   | 7 (47)                                               | 12 (32)                       | 17 (27)                          | 0.31    |
| <b>Blood cancers</b>                                 | <b>n=84</b>                                                               | <b>n=5</b>                                           | <b>n=15</b>                   | <b>n=64</b>                      |         |
| <b>Diagnosis, n(%)</b>                               |                                                                           |                                                      |                               |                                  |         |
| Lymphoma                                             | 25 (30)                                                                   | 2 (40)                                               | 2 (13)                        | 21 (33)                          | 0.35    |
| Myeloma                                              | 29 (35)                                                                   | 0 (0)                                                | 5 (33)                        | 24 (38)                          |         |
| CLL                                                  | 17 (20)                                                                   | 1 (20)                                               | 5 (33)                        | 11 (17)                          |         |
| Acute Leukaemia                                      | 10 (12)                                                                   | 1 (20)                                               | 2 (13)                        | 7 (11)                           |         |
| Myelodysplastic syndrome                             | 3 (4)                                                                     | 1 (20)                                               | 1 (7)                         | 1 (2)                            |         |
| <b>Cancer Status, n(%)</b>                           |                                                                           |                                                      |                               |                                  |         |
| No diagnosis at primary vaccination                  | 3(4)                                                                      | 0 (0)                                                | 1 (7)                         | 2 (3)                            | 0.13    |
| Complete response to SACT/remission                  | 37 (44)                                                                   | 4 (80)                                               | 3 (20)                        | 30 (47)                          |         |
| Never treated                                        | 12 (14)                                                                   | 0 (0)                                                | 5 (33)                        | 7 (11)                           |         |
| Progressive disease on SACT/relapse                  | 10 (12)                                                                   | 0 (0)                                                | 2 (13)                        | 8 (13)                           |         |
| Partial response to SACT/remission                   | 17 (20)                                                                   | 1 (20)                                               | 3 (20)                        | 13 (20)                          |         |
| Stable disease                                       | 5 (6)                                                                     | 0 (0)                                                | 1 (7)                         | 4 (6)                            |         |
| <b>Rx prior to 1st vaccine dose, n(%)</b>            |                                                                           |                                                      |                               |                                  |         |
| Chemotherapy                                         | 7 (8)                                                                     | 0 (0)                                                | 2 (13)                        | 5 (8)                            | 0.86    |
| Targeted therapy, <28 days                           | 21 (25)                                                                   | 1 (20)                                               | 2 (13)                        | 18 (28)                          | 0.39    |
| Anti-CD20 mAb, <12 mths                              | 7 (8)                                                                     | 1 (20)                                               | 0 (0)                         | 6 (9)                            | 0.49    |
| BTKi therapy, <28 days                               | 5 (6)                                                                     | 1 (20)                                               | 1 (7)                         | 3 (5)                            | 1       |
| No recent SACT                                       | 50 (59)                                                                   | 2 (40)                                               | 10 (67)                       | 38 (59)                          | 0.82    |
| HSCT, ever                                           | 35 (42)                                                                   | 3 (60)                                               | 8 (53)                        | 24 (38)                          | 0.41    |
| Autograft, ever                                      | 22 (26)                                                                   | 0 (0)                                                | 5 (33)                        | 17 (27)                          |         |
| Allograft, ever                                      | 13 (15)                                                                   | 3 (60)                                               | 3 (20)                        | 7 (11)                           |         |
| HSCT, <6 months                                      | 7 (8)                                                                     | 1 (20)                                               | 1 (7)                         | 5 (8)                            | 1       |
| CAR-T, <6 months                                     | 3 (4)                                                                     | 0 (0)                                                | 0 (0)                         | 3 (5)                            | 0.92    |

| Rx prior to 3rd vaccine dose, n(%) |         |        |        |         |      |
|------------------------------------|---------|--------|--------|---------|------|
| Chemotherapy, <28 days             | 13 (15) | 0 (0)  | 3 (20) | 10 (16) | 0.98 |
| Targeted therapy, <28 days         | 26 (31) | 1 (20) | 5 (33) | 20 (31) | 0.88 |
| Anti-CD20 mAb, <12 mths            | 10 (12) | 1 (20) | 0 (0)  | 9 (14)  | 0.15 |
| BTKi therapy, <28 days             | 5 (6)   | 1 (20) | 1 (7)  | 3 (5)   | 0.75 |
| No recent SACT                     | 40 (48) | 2 (40) | 7 (47) | 31 (48) | 0.90 |

4  
5  
6  
7  
8  
9  
10  
11  
12  
13

**Third vaccine dose cohort:** all patients received a third COVID-19 vaccine (n=199); the cohort is split according to presence or absence of detectable NABs to the Omicron variant of concern *before* the third vaccine dose (matched samples available in 179/199 patients). Values are numbers and percentages n(%) unless otherwise stated. Comparison of baseline characteristics was performed using either MacNemar, Chi2, Mann-Whitney U test as appropriate; a p-value of <0.05 was considered significant.

BTK-i, Bruton's tyrosine kinase inhibitor; CAR-T, chimeric antigen receptor T cell; CLL, chronic lymphocytic leukaemia; CTLA-4, cytotoxic T-lymphocyte-associated protein 4; HSCT, hematopoietic stem cell transplant; IQR, interquartile range; mAB, monoclonal antibody; NR, non-responders; PD-1, programmed death ligand-1; Rx, treatment; SACT, systemic anti-cancer therapy; WT, wildtype.

14 **Table S2: Association of clinical parameters with detectable NAb against Omicron**

|                                                                                  | Detectable NAb against Omicron |                    |          |
|----------------------------------------------------------------------------------|--------------------------------|--------------------|----------|
|                                                                                  | Patients (n)                   | OR(95%CI)          | p-value  |
| <b>Cancer patients, n=199</b>                                                    |                                |                    |          |
| <b>Intercept</b>                                                                 |                                | 1.64(0.85-3.21)    | 0.22     |
| <b>Cancer Type</b>                                                               |                                |                    |          |
| Solid (vs. blood cancer)                                                         | 115/199                        | 7.51(4.05-14.63)   | <0.0001* |
| <b>Vaccine Type (1<sup>st</sup> and 2<sup>nd</sup> dose)</b>                     |                                |                    |          |
| BNT162b2 (vs ChAdOx1)                                                            | 66/199                         | 0.91(0.49-1.73)    | 0.82     |
| <b>Age</b>                                                                       |                                |                    |          |
| >60 years (vs <= 60 years)                                                       | 107/199                        | 0.60(0.32-1.09)    | 0.17     |
| <b>Sex</b>                                                                       |                                |                    |          |
| Male (vs female)                                                                 | 113/199                        | 1.12(0.61-2.07)    | 0.76     |
| <b>Blood cancer patients, n=84</b>                                               |                                |                    |          |
| <b>Intercept</b>                                                                 |                                | 18.96(2.77-194.74) | 0.020    |
| <b>Diagnosis (vs Myeloma)</b>                                                    |                                |                    |          |
| Acute leukemia                                                                   | 10/84                          | 0.10(0.008-0.78)   | 0.088    |
| Chronic lymphocytic leukemia                                                     | 17/84                          | 0.27(0.03-2.15)    | 0.31     |
| Myelodysplastic syndrome                                                         | 3/84                           | 0.32(0.02-7.08)    | 0.52     |
| Lymphoma                                                                         | 25/84                          | 0.18(0.02-1.26)    | 0.17     |
| <b>Vaccine Type (1<sup>st</sup> and 2<sup>nd</sup> dose)</b>                     |                                |                    |          |
| BNT162b2 (vs ChAdOx1)                                                            | 31/84                          | 0.53(0.18-1.55)    | 0.33     |
| <b>Age</b>                                                                       |                                |                    |          |
| >60 years (vs <= 60 years)                                                       | 46/84                          | 1.56(0.49-5.20)    | 0.53     |
| <b>Status after most recent anti-cancer therapy (vs complete response)</b>       |                                |                    |          |
| Never treated                                                                    | 12/84                          | 0.85(0.16-4.95)    | 0.87     |
| Progressive disease                                                              | 10/84                          | 0.08(0.01-0.46)    | 0.027*   |
| Partial response                                                                 | 17/84                          | 0.22(0.03-1.30)    | 0.18     |
| Stable disease                                                                   | 5/84                           | 0.06(0.003-0.54)   | 0.056    |
| <b>Anti-cancer therapy †</b>                                                     |                                |                    |          |
| B-cell depleting therapy (anti-CD20 [within 12 months] or BTKi [within 28 days]) | 15/84                          | 0.04(0.003-0.21)   | 0.0074*  |
| Targeted therapy within 28 days                                                  | 26/84                          | 0.64(0.10-3.19)    | 0.66     |
| Chemotherapy within 28 days                                                      | 13/84                          | 1.71(0.34-11.04)   | 0.60     |
| HSCT or CAR-T within 6 months                                                    | 10/84                          | 0.21(0.03-1.20)    | 0.15     |

15 NAb were binned in detected ( $\geq 40$ ) or undetected ( $<40$ ) †For anti-cancer therapy indicated treatment was tested for  
 16 patients who received the treatment vs patients not receiving that treatment. BTKi, Bruton's tyrosine kinase inhibitor; CAR-  
 17 T, chimeric antigen receptor T cell; HSCT – Haematopoietic stem cell transplant.

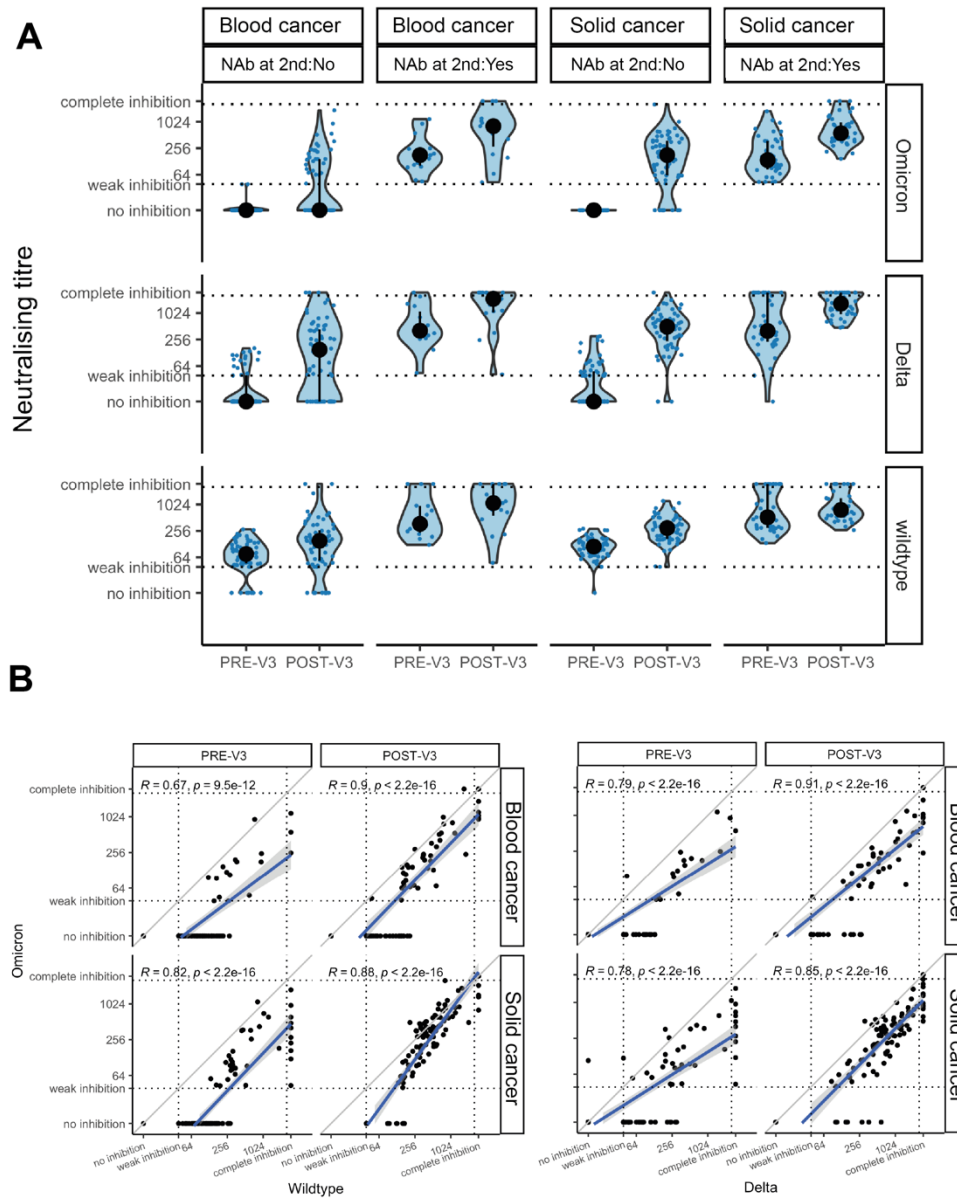

18  
19  
20  
21  
22  
23  
24  
25  
26  
27  
28  
29  
30  
31  
32

**Figure S1: NAb responses against Omicron in patients after three COVID-19 vaccine doses**

A) NAbT against Delta and Omicron before (PRE-V3, n=179) or after three vaccine doses (POST-V3, n=199). Samples were further split as having detectable or undetectable NAbT against Omicron after the second dose. Horizontal lines denote the upper and lower limit of detection. Violin plots denote data density, Pointrange denotes the median and the 25th and 75th percentile. Data points represent individual samples. NAb against Delta and WT were reported previously and were added for comparison (1). Scatterplot of NAbT against Omicron vs NAbT against wildtype and Delta respectively (PRE-V3, n=179; POST-V3, n=199). Each data point represents an individual sample. Horizontal lines denote the upper and lower limit of detection. The linear regression line is blue with 95% CI in grey. Spearman's rank correlation coefficients and corresponding p-values are denoted in the panel for each group. Blood cancer: patients with blood cancer; Solid cancer: patients with solid cancer.

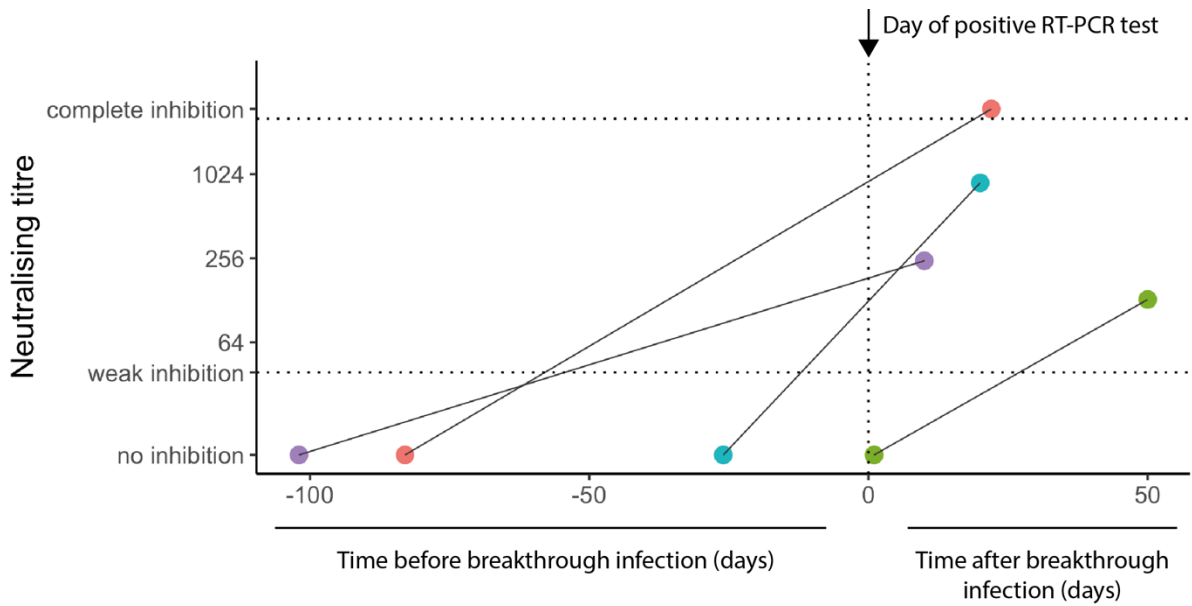

33  
 34 **Figure S2: NAb against Omicron in patients with breakthrough Delta infection after two vaccine**  
 35 **doses**

36 NAbT against Omicron were measured at varying time points before and after infection in four  
 37 patients with breakthrough Delta infections after two vaccine doses. Vertical line denotes the day  
 38 SARS-CoV-2 infection was confirmed by RT-PCR; horizontal lines indicate the upper and lower limit of  
 39 NAbT detection. Different colours represent individual patients, and time points are connected. NAb,  
 40 Neutralising antibody; NAbT, Neutralising antibody titres.  
 41

## 42 **Methods**

### 43 **Study design**

44 CAPTURE (NCT03226886) is a prospective, longitudinal cohort study that commenced recruitment in  
45 May 2020 and continues to enrol patients at the Royal Marsden NHS Foundation Trust. The study  
46 design has been previously published (1). In brief, adult patients with a current diagnosis or history of  
47 invasive cancer are eligible for enrolment. Inclusion criteria are intentionally broad, and patients were  
48 recruited irrespective of cancer type, stage, or treatment. Patients recruited to the CAPTURE study  
49 who had received two COVID-19 vaccine doses, and subsequently a third dose regardless of prior  
50 SARS-CoV-2 infection status, were included in this analysis. The primary endpoint of the CAPTURE  
51 vaccine was the seroconversion rate in cancer patients at 14-28 days following the second dose of  
52 vaccine (2). Exploratory endpoints include evaluation of neutralising responses to SARS-CoV-2 variants  
53 of concern (VOC). When considering the neutralising response to Omicron VOC, there was no prior  
54 published data in cancer patients in this setting, and the sample size was determined by the number  
55 of eligible patients recruited at the time of evaluation. The most precise estimate of NAb responses in  
56 cancer patients would be achieved by recruiting as many patients as possible in the time period.

57

58 CAPTURE received ethical approval as a substudy of the TRACERx Renal Study (NCT03226886).  
59 TRACERx Renal was initially approved by the NRES Committee London, Fulham, on January 17, 2012  
60 (11/LO/1996). The CAPTURE protocol was part of Substantial Amendment 9 and received approval by  
61 the Health Research Authority on April 30, 2020, and the NRES Committee London, Fulham on May 1,  
62 2020. CAPTURE is conducted in accordance with the ethical principles of the Declaration of Helsinki,  
63 Good Clinical Practice and applicable regulatory requirements. All patients provided written, informed  
64 consent to participate. The Chief Investigator, Samra Turajic is responsible for the oversight of all  
65 aspects of study conduct and governance.

66

### 67 **Study schedule and follow-up**

68 We previously reported results following two COVID-19 vaccine doses (3) where clinical data and  
69 samples collection was performed at baseline (pre-first dose vaccine or within 14 days of first dose  
70 vaccine), at timepoints follow-up 1 (FU1; 2-4 weeks post-first dose vaccine); FU2 (within 14 days  
71 before the second vaccine); FU3 (2-4 weeks post-second dose vaccine). Patients eligible for a third  
72 vaccine dose were invited to receive the vaccine in our institution. Samples were collected before the  
73 third vaccine dose (Pre-V3; 0-28 days before the third dose) and following the third vaccine dose (Post-  
74 V3; 14-28 days post third vaccination).

75

76 **Patient data and sample sources**

77 Demographic, epidemiological and clinical data (e.g. cancer type, cancer stage, treatment history)  
78 were collected from the internal electronic patient record, and pseudonymised data was entered into  
79 a cloud-based electronic database (Ninox Software, Berlin, Germany). Regarding systemic-anticancer  
80 therapy (SACT), we deemed chemotherapy, targeted therapy (small molecule inhibitors or  
81 monoclonal antibodies) or endocrine therapy to be current if given within 28 days of vaccination.  
82 Treatment with immune checkpoint inhibitors (CPI) within six months was considered significant given  
83 the prolonged receptor occupancy reported with these agents (3). Treatment with ant-CD20  
84 monoclonal antibodies within 12 months was considered. Concomitant medications were recorded  
85 for: corticosteroids (considered significant if >10mg prednisolone equivalent given for at least seven  
86 days); GCSF when delivered within 48 hours of vaccination or five days in the case of pegylated  
87 preparation; and other immunosuppressive drugs taken within 48 hours of vaccination.

88

89 Patients were grouped by cancer diagnosis (solid vs blood cancer). Where two independent diagnoses  
90 of cancer were identified in the same patient, the case was reviewed by two clinicians (STCS & AMS),  
91 and the highest stage and/or cancer receiving active treatment was used for classification. Patients  
92 with haematological malignancies were grouped by conventional subtypes.

93

94 Detailed sampling schedule and methodology were described previously (1). Study biospecimens  
95 included per-protocol blood samples, oropharyngeal swabs and cryostored serum from routine clinical  
96 investigations. Collected data and study samples were de-identified and stored with only the study-  
97 specific study identification number.

98

99 **Definition of breakthrough SARS-CoV-2 infection**

100 We considered patients to have had a breakthrough SARS-CoV-2 infection if they had SARS-CoV-2  
101 positive RT-PCR (tests conducted as part of routine clinical care) at least seven days following the  
102 second COVID-19 vaccine dose.

103

104 **WHO classification of severity of COVID-19**

105 We classified the severity of COVID-19 according to the WHO clinical progression scale (4). Uninfected:  
106 uninfected, no viral RNA detected – 0; Asymptomatic: viral RNA and/or S1-reactive IgG detected – 1;  
107 mild (ambulatory): symptomatic, independent – 2; symptomatic, assistance needed - 3; moderate  
108 (hospitalised): no oxygen therapy (if hospitalised for isolation only, record status as for ambulatory  
109 patient) – 4; oxygen by mask or nasal prongs - 5; severe (hospitalised): oxygen by non-invasive



110 ventilation or high flow – 6; intubation and mechanical ventilation,  $pO_2/FiO_2 \geq 150$  or  $SpO_2/FiO_2 \geq 200$   
111 – 7; mechanical ventilation,  $pO_2/FiO_2 < 150$  ( $SpO_2/FiO_2 < 200$ ) or vasopressors – 8; mechanical  
112 ventilation,  $pO_2/FiO_2 < 150$  and vasopressors, dialysis, or extracorporeal membrane oxygenation - 9;  
113 Dead - 10.

114

### 115 **Handling of whole blood samples**

116 All blood samples and isolated products were handled in a CL2 laboratory inside a biosafety cabinet  
117 using appropriate personal protective equipment and safety measures, which were in accordance with  
118 a risk assessment and standard operating procedure approved by the safety, health and sustainability  
119 committee of the Francis Crick Institute. For indicated experiments, serum or plasma samples were  
120 heat-inactivated at 56°C for 30 minutes prior to use after which they were used in a CL1 laboratory.

121

### 122 **Serum isolation**

123 Whole blood was collected in serum coagulation tubes (Vacuette CAT tubes, Greiner) for serum  
124 isolation and stored at 4°C until processing. All samples were processed within 24 hrs. Time of blood  
125 draw, processing, and freezing was recorded for each sample. Tubes were centrifuged for 10 minutes  
126 at 2000g at 4°C. Serum was separated from the clotted portion, aliquoted and stored at -80°C.

127

### 128 **Virus variants & culture**

129 The B.1.617.2 (“Delta”) isolate was MS066352H (GISAID accession number EPI\_ISL\_1731019), which  
130 carries the T19R, K77R, G142D,  $\Delta$ 156-157/R158G, A222V, L452R, T478K, D614G, P681R, D950N, and  
131 was kindly provided by Prof. Wendy Barclay, Imperial College London, London, UK through the  
132 Genotype-to-Phenotype National Virology Consortium (G2P-UK). The BA.1 (“Omicron”) isolate was  
133 M21021166, which carries the A67V,  $\Delta$ 69-70, T95I,  $\Delta$ 142-144, Y145D,  $\Delta$ 211, L212I, G339D, S371L,  
134 S373P, S375F, K417N, N440K, G446S, S477N, T478K, E484A, Q493R, G496S, Q498R, N501Y, Y505H,  
135 T547K, D614G, H655Y, N679K, P681H, A701V, N764K, D796Y, N856K, Q954H, N969K, and L981F  
136 mutations in Spike. It was kindly provided by Prof. Gavin Screaton, University of Oxford, Oxford, UK  
137 through the Genotype-to-Phenotype National Virology Consortium (G2P-UK). All viral isolates were  
138 propagated in Vero E6 cells. Briefly, 50% confluent monolayers of Vero E6 cells were infected with the  
139 given SARS CoV-2 strains at an MOI of approx. 0.001. Cells were washed once with DMEM (Sigma;  
140 D6429), then 5 ml virus inoculum made up in DMEM was added to each T175 flask and incubated at  
141 room temperature for 30 minutes. DMEM + 1% FCS (Biosera; FB-1001/500) was added to each flask.

142 Cells were incubated at 37° C, 5% CO<sup>2</sup> for four days until the extensive cytopathogenic effect was  
143 observed. The supernatant was harvested and clarified by centrifugation at 2000 rpm for 10 minutes  
144 in a benchtop centrifuge. The supernatant was aliquoted and frozen at -80°C.

145

#### 146 **Virus PCR and sequencing**

147 All virus stocks generated for use in neutralisation assays were sequence-validated before use. To  
148 confirm the identity of cultured VoC samples, 8ul of viral RNA was prepared for sequencing by the  
149 ARTIC method (<https://www.protocols.io/view/ncov-2019-sequencingprotocol-v3-locost-bh42j8ye> )  
150 and sequenced on the ONT GridION platform to >30k reads/sample. The data was demultiplexed and  
151 processed using the viralrecon pipeline (<https://github.com/nf-core/viralrecon>).

152

#### 153 **High-throughput live virus micro-neutralisation assay**

154 High-throughput live virus micro-neutralisation assays were performed as described previously (5).  
155 Briefly, Vero E6 cells (Institut Pasteur) at 90-100% confluency in 384-well format were first titrated  
156 with varying MOI of each SARS-CoV-2 variant and varying concentrations of a control monoclonal  
157 nanobody in order to normalise for possible replicative differences between variants and select  
158 conditions equivalent to wild-type virus. Following this calibration, cells were infected in the presence  
159 of serial dilutions of patient serum samples. After infection (24 hrs Vero E6 Pasteur), cells were fixed  
160 with 4% final Formaldehyde, permeabilised with 0.2% TritonX-100, 3% BSA in PBS (v/v), and stained  
161 for SARS-CoV-2 N protein using Alexa488-labelled-CR3009 antibody produced in-house and cellular  
162 DNA using DAPI (6). Whole-well imaging at 5x was carried out using an Opera Phenix (Perkin Elmer)  
163 and fluorescent areas and intensity calculated using the Phenix-associated software Harmony 9  
164 (Perkin Elmer). Inhibition was estimated from the measured area of infected cells/total area occupied  
165 by all cells. The inhibitory profile of each serum sample was estimated by fitting a 4-parameter dose-  
166 response curve executed in SciPy. Neutralising antibody titres are reported as the fold-dilution of  
167 serum required to inhibit 50% of viral replication (IC<sub>50</sub>). They are further annotated if they lie above  
168 the quantitative (complete inhibition) range, below the quantitative range but still within the  
169 qualitative range (i.e. partial inhibition is observed, but a dose-response curve cannot be fit because  
170 it does not sufficiently span the IC<sub>50</sub>), or if they show no inhibition at all. IC<sub>50</sub> values above the  
171 quantitative limit of detection of the assay (>2560) were recoded as 3000; IC<sub>50</sub> values below the  
172 quantitative limit of the assay (< 40) but within the qualitative range were recoded as 39 and data  
173 below the qualitative range (i.e. no response observed) were recoded as 10.

174

#### 175 **Quantification and statistical analysis**

176 Data and statistical analysis were done in R v3.6.1 in R studio v1.2.1335. McNemar, Chi2, Mann-  
177 Whitney U tests were used to evaluate statistical significance. A p-value <0.05 was considered  
178 significant. All tests were performed two-sided. Statistical details for each experiment are provided in  
179 the figure legends. The ggplot2 package in R was used for data visualisation. Data are plotted as single  
180 data points and violin plots on a logarithmic scale. PointRange in violin plots denotes median and  
181 upper and lower quartiles. Multivariable binary logistic regression analysis was performed using the  
182 glm function within the stats package in R, OR and 95% CI were generated using the coef and confint  
183 function within the stats package in R. Covariates included in the model were selected based on  
184 previously reported effects (3, 8, 9) on NAb responses after two or three doses of COVID-19 vaccine.  
185 The reference was chosen for covariates with multiple categories to reflect the group with the least  
186 expected effect on NAb response. Anti-CD20 and BTKi treatments were combined in a single covariate  
187 based on their similar effect on B cell levels. HSCT and CAR-T were combined based on the similar  
188 effect on immune responses, particularly on T follicular helper cell suppression and reduced B cell  
189 subset number and function.

190 **Supplemental References**

- 191 1. Au L, Boos LA, Swerdlow A, et al. Cancer, COVID-19, and Antiviral Immunity: The  
192 CAPTURE Study. *Cell*. 2020;183(1):4-10.
- 193 2. Fendler A, Shepherd STC, Au L, et al. Adaptive immunity and neutralizing antibodies  
194 against SARS-CoV-2 variants of concern following vaccination in patients with cancer: the  
195 CAPTURE study. *Nature Cancer*. 2021.
- 196 3. Fessas P, Lee H, Ikemizu S, Janowitz T. A molecular and preclinical comparison of the  
197 PD-1-targeted T-cell checkpoint inhibitors nivolumab and pembrolizumab. *Semin Oncol*.  
198 2017;44(2):136-40.
- 199 4. Reynolds CJ, Swadling L, Gibbons JM, et al. Healthcare workers with mild /  
200 asymptomatic SARS-CoV-2 infection show T cell responses and neutralising antibodies after  
201 the first wave. *medRxiv*. 2020:2020.10.13.20211763.
- 202 5. Faulkner N, Ng KW, Wu MY, et al. Reduced antibody cross-reactivity following  
203 infection with B.1.1.7 than with parental SARS-CoV-2 strains. *eLife*. 2021;10:e69317.
- 204 6. Brink ENvd, Meulen Jt, Cox F, et al. Molecular and Biological Characterization of  
205 Human Monoclonal Antibodies Binding to the Spike and Nucleocapsid Proteins of Severe  
206 Acute Respiratory Syndrome Coronavirus. *Journal of Virology*. 2005;79(3):1635-44.  
207

## 208 **Acknowledgements**

209 We thank the clinical leads and subunit teams for recruiting patients to the study, including  
210 F. Gronthoud, C. Messiou, D. Cunningham, I. Chau, N. Starling, N. Turner, L. Welsh, R. L. Jones,  
211 J. Droney, S. Banerjee, K. Harrington, S. Bhide, A. Okines, A. Reid, S. Kumar. We thank the  
212 CAPTURE trial team, including E. Carlyle, K. Edmonds and L. Del Rosario, as well as H. Ahmod,  
213 L. Holt, M. O’Flaherty, D. Kelly, R. Dhaliwal, N. Ash, M. Mumin, L. Dowdie, K. Kelly, F. Williams,  
214 T. Foley, C. Lewis, M. Ndlovu, S. Ali, K. Lingard, S. Sarker, M. Mangwende, N. Hunter, J.  
215 Korteweg, A. Murra, N Shaikh , K. Peat, Mandisa Ndlovu, Kate Cullinan, Fiona Dexter and Nikhil  
216 Rudra. We thank the administrative team that delivered the RMH vaccine program, including  
217 E. Mossman and J. Codet-Boise. We thank the following for their assistance with trial conduct  
218 and. data collection, Laura A. Boos, Nalinie Joharatnam-Hogan, Wanyuan Cui, Javier Pascual,  
219 Simon Rodney, Justin Mencil, Olivia Curtis, Clemency Stephenson, Anna Robinson, Bhavna  
220 Oza, Sheima Farag, Isla Leslie, We thank clinical research network nurses for their input with  
221 consent and specimen collection including H. Evans, N. Evans, S. Cooper, S. Jain, S. White, L.  
222 Roland, L. Hobbs and J. Dobbyn. We acknowledge the tremendous support from clinical and  
223 research teams at participating units at the Royal Marsden Hospital, including E. Black, A. Dela  
224 Rosa, C. Pearce, J. Bazin, L. Conneely, C. Burrows, T. Brown, J. Tai, E. Lidington, H. Hogan, A.  
225 Upadhyay, D. Capdeferro, I. Potyka, A. Drescher, F. Baksh, M. Balcorta, C. Da Costa Mendes,  
226 J. Amorim, V. Orejudos and L. Davison. We also thank volunteer staff at the Francis Crick  
227 Institute, the Crick COVID-19 Consortium. Due to the pace at which the field is evolving, we  
228 acknowledge researchers of COVID-19, particularly those furthering our understanding of the  
229 COVID-19 vaccine-induced immune response. We apologise for work that was not cited. This  
230 research was funded in part by the National Institute for Health Research (NIHR) Biomedical  
231 Research Centre at the Royal Marsden NHS Foundation Trust (RMCC32), Cancer Research UK  
232 (CRUK) (grant reference number C50947/A18176). This work was supported by the Francis  
233 Crick Institute, which receives its core funding from CRUK (FC001988, FC001218, FC001099,  
234 FC001002, FC001078, FC001169, FC001030, FC011104), the UK Medical Research Council  
235 (FC001988, FC001218, FC001099, FC001002, FC001078, FC001169, FC001030, FC011104), the  
236 Wellcome Trust (FC001988, FC001218, FC001099, FC001002, FC001078, FC001169,  
237 FC001030, FC011104), and the UK Research and Innovation and the UK Medical Research  
238 Council (MR/W005611/1). TRACERx Renal is partly funded by the NIHR Biomedical Research  
239 Centre at the Royal Marsden Hospital and the ICR (A109). The CAPTURE study is sponsored  
240 by the Royal Marsden NHS Foundation Trust and funded from a Royal Marsden Cancer Charity  
241 grant. We thank Prof. Wendy Barclay of Imperial College and the wider Genotype to  
242 Phenotype consortium for the Alpha and Delta strains used in this study, and Max Whiteley  
243 and Thushan I de Silva at The University of Sheffield and Sheffield Teaching Hospitals NHS  
244 Foundation Trust for providing source material. We thank Prof. Gavin Screaton of the  
245 University of Oxford for the Omicron strain used in this study. A. Rogiers is supported by an  
246 ESMO clinical research fellowship. R.J.W. and K.A.W. receive support from Rosetrees (M926).  
247 A.F. has received funding from the European Union’s Horizon 2020 research and innovation  
248 program under Marie Skłodowska-Curie grant agreement no. 892360. S.T.C.S. is supported  
249 and funded by a CRUK Clinician PhD Fellowship award. L.A. is funded by the Royal Marsden  
250 Cancer Charity. F.B. is funded by Rosetrees Charity (grant reference M829). S.T. is funded by  
251 CRUK (grant reference number C50947/A18176), the NIHR Biomedical Research Centre at the  
252 Royal Marsden Hospital and the Institute of Cancer Research (grant reference number A109),  
253 the Kidney and Melanoma Cancer Fund of the Royal Marsden Cancer Charity, the Rosetrees  
254 Trust (grant reference number A2204), Ventana Medical Systems (grant reference numbers

255 10467 and 10530), the National Institutes of Health (US) and the Melanoma Research  
256 Alliance. A.M.S. received an educational grant from Janssen-Cilag. C. Swanton is funded by  
257 CRUK (TRACERx, PEACE and CRUK Cancer Immunotherapy Catalyst Network), the CRUK Lung  
258 Cancer Centre of Excellence (C11496/A30025), the Rosetrees Trust, Butterfield and  
259 Stonegate Trusts, the Novo Nordisk Foundation (ID16584), a Royal Society Professorship  
260 Enhancement award (RP/EA/180007), the NIHR Biomedical Research Centre at University  
261 College London Hospitals, the CRUK University College London Centre, the Experimental  
262 Cancer Medicine Centre and the Breast Cancer Research Foundation (BCRF 20-157). This work  
263 was supported by a Stand Up To Cancer-LUNGevity-American Lung Association Lung Cancer  
264 Interception Dream Team Translational research grant (grant number SU2C-AACR-DT23-17 to  
265 S.M. Dubinett and A.E. Spira). Stand Up To Cancer is a division of the Entertainment Industry  
266 Foundation. Research grants are administered by the American Association for Cancer  
267 Research, the scientific partner of SU2C. C. Swanton received an ERC Advanced Grant  
268 (PROTEUS) from the European Research Council under the European Union's Horizon 2020  
269 research and innovation program (grant agreement no. 835297). C. Swanton is a Royal Society  
270 Napier Research Professor (RP150154). R.J.W. has received funding from the Francis Crick  
271 Institute, which receives its core funding by Wellcome (FC0010218), UKRI (FC0010218) and  
272 CRUK (FC0010218) and research funding from Wellcome (203135 and 222754), Rosetrees  
273 (M926) and the South African MRC.

274

## 275 **Author contributions**

276 Conceptualization: Annika Fendler, Scott T.C. Shepherd, Lewis Au, Samra Turajlic  
277 Data curation: Annika Fendler, Scott T.C. Shepherd, Lewis Au, Mary Wu, Ruth Harvey, Andreas  
278 M. Schmitt, Zayd Tippu, Benjamin Shum, Sheima Farag, Aljosja Rogiers, Tara Foley, Eleanor  
279 Carlyle, Kim Edmonds  
280 Formal Analysis: Annika Fendler, Scott T.C. Shepherd, Lewis Au, Samra Turajlic  
281 Funding acquisition: Annika Fendler, Lewis Au, Samra Turajlic  
282 Investigation: Annika Fendler, Scott T.C. Shepherd, Lewis Au, Mary Wu, Ruth Harvey, Taja  
283 Barber, Andrea Emslie-Henry, Niamh Caulfield-Lynch, Fiona Byrne, Daqi Deng, Svend Kjaer,  
284 Ok-Ryul Song, Christophe Queval, Caitlin Kavanagh, Kema Peat, Denise Kelly, Aida Murra,  
285 Kayleigh Kelly, Molly O'Flaherty, Nadia Yousaf, Shaman Jhanji, David Cunningham, Nicholas  
286 Van As, Kate Young, Andrew J.S. Furness, Lisa Pickering, Emma Nicholson, Samra Turajlic  
287 Methodology: Annika Fendler, Mary Wu, Ruth Harvey,  
288 Project administration: Annika Fendler, Scott T.C. Shepherd, Lewis Au, Eleanor Carlyle, Kim  
289 Edmonds, Lyra Del Rosario, Karla Lingard, Mary Mangwende, Lucy Holt, Hamid Ahmod,  
290 Justine Korteweg, Tara Foley, Samra Turajlic (oversight and governance)  
291 Resources: Mary Wu, Ruth Harvey, Emma C. Wall, Edward J. Carr, Simon Caidan, James I  
292 MacRae, Robyn L. Shea, Gail Gardner, Darren Murray, Sonia Gandhi, Steve Gamblin, David  
293 L.V. Bauer, Kate C. Tatham, Susanna Walker, James Larkin, Samra Turajlic  
294 Software: Mike Gavrielides,  
295 Supervision: Gavin Kelly, Rupert Beale, Charles Swanton, George Kassiotis, Michael Howell,  
296 Emma Nicholson, Susanna Walker, James Larkin, Samra Turajlic  
297 Validation: Annika Fendler, Scott T.C. Shepherd, Lewis Au, Emma C. Wall, Edward J. Carr, David  
298 L.V. Bauer, Mary Wu  
299 Data verification: Annika Fendler, Scott T.C. Shepherd  
300 Visualization: Annika Fendler, Scott T.C. Shepherd, Lewis Au, Samra Turajlic  
301 Writing – original draft: Annika Fendler, Scott T.C. Shepherd, Lewis Au, Samra Turajlic

- 302 Writing – review & editing: All authors
- 303 Decision to submit manuscript: Samra Turajlic

304 **Consortium Member Lists**

305

306 **The CAPTURE consortium**

307

308 The members of the CAPTURE consortium include Lewis Au, Susana Banerjee, Katie Bentley,  
309 Shree Bhide, Fiona Byrne, The Crick COVID-19 Consortium, Ian Chau, David Cunningham,  
310 Joanne Droney, Annika Fendler, Andrew Furness, Camille Gerard, Firza Gronthud, Kevin  
311 Harrington, Shaman Jhanji, Robin Jones, George Kassiotis, Sacheen Kumar, James Larkin,  
312 Ethna McFerran, Christina Messiou, Emma Nicholson, Alicia Okines, Clare Peckitt, Lisa  
313 Pickering, Alison Reid, Jennifer Rusby, Andreas Schmitt, Scott Shepherd, Ben Shum, Naureen  
314 Starling, Anthony Swerdlow, Kate Tatham, Samra Turajlic, Nicholas Turner, Liam Welsh,  
315 Katalin Wilkinson, Robert J. Wilkinson, Matthew Wheeler, Kate Young, and Nadia Yousaf.
